# Supplementary material
Source: Royal Society of Chemistry journal article supplement (doi:10.1039/d6tc00974c)
Supplement: d6tc00974c1.pdf [file d6tc00974c1.pdf]

## SUPPLEMENTARY INFORMATION

### **Laser-tunable Raman markers based on glass-ceramic/ $\beta$ -carotene mixtures for advanced anti-counterfeiting applications**

Alberto Moure<sup>1</sup>, Pablo Rabasco<sup>1</sup>, Esther Gómez<sup>2</sup>, Vicente García-Juez<sup>2</sup>, José Francisco Fernández<sup>1</sup>, María Fernández-Álvarez<sup>1\*</sup>

<sup>1</sup>Instituto de Cerámica y Vidrio (ICV), CSIC, Kelsen 5, 28049, Madrid (Spain)

<sup>2</sup>Burgos Paper Mill, Fábrica de Moneda y Timbre – Real Casa de la Moneda (FNMT-RCM), Av. Costa Rica 2, 0900, Burgos (Spain).

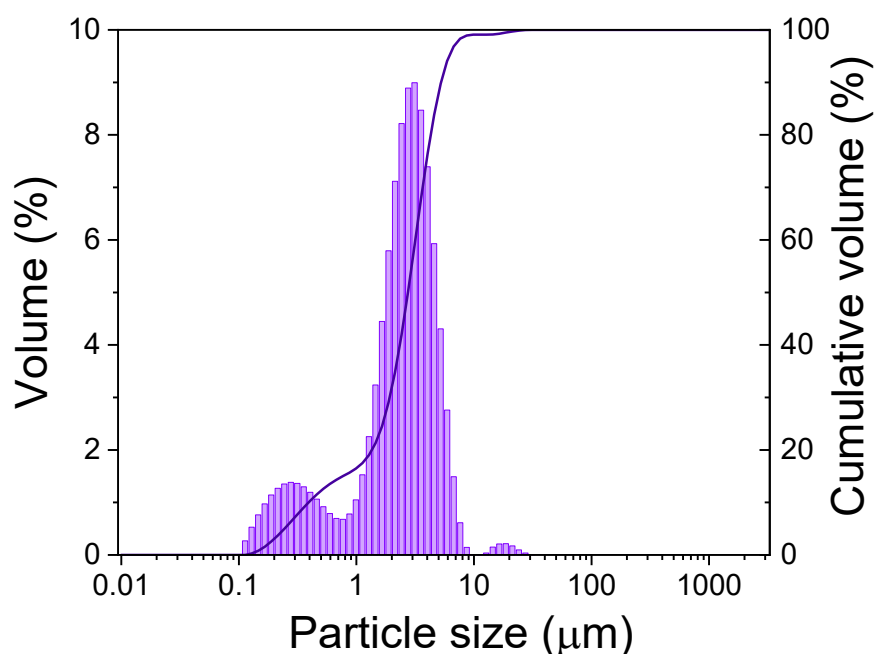

**Figure S1.** Particle size distribution of the carbon black (CB) used.

Table 1: Summary of the conditions for all the Raman measurements carried out in this work.

| Material      | Measurement Power (mW) | Measurement Time (s) | Figure   |
|---------------|------------------------|----------------------|----------|
| b-carotene    | 45                     | 0.5                  | Figure 2 |
| RM            | 290                    | 0.1                  | Figure 2 |
| RM/b-Carotene | 45                     | 1                    | Figure 4 |

|                                         |    |     |          |
|-----------------------------------------|----|-----|----------|
| RM/b-Carothene 80/20+<br>5% CB          | 6  | 40s | Figure 5 |
| b-Carothene (with<br>temperature)       | 45 | 400 | Figure 6 |
| RM/b-Carothene (with<br>temperature)    | 45 | 2   | Figure 6 |
| RM/b-Carothene 80/20+<br>5% CB in epoxy | 17 | 10  | Figure 8 |

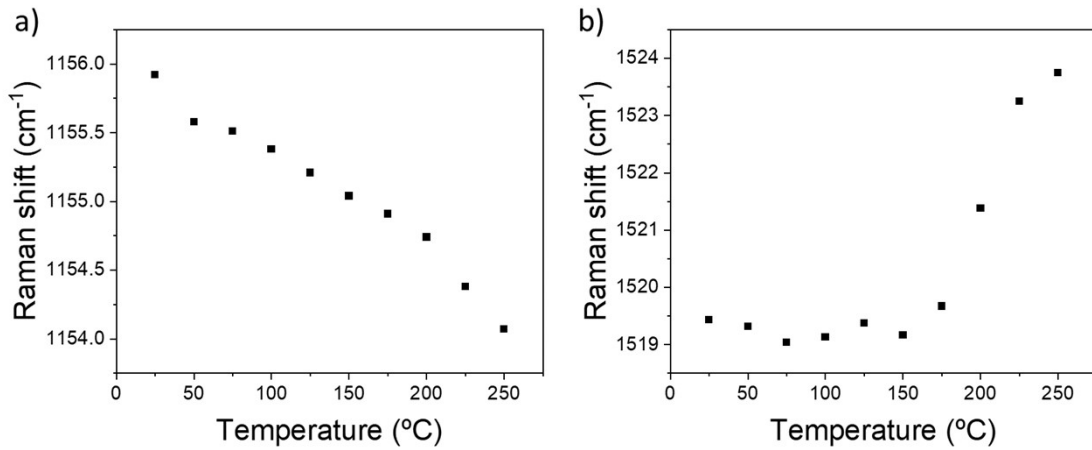

**Figure S2.** Raman shift evolution of a) 1156 and b) 1518 cm<sup>-1</sup> β-carotene Raman bands as a function of temperature.

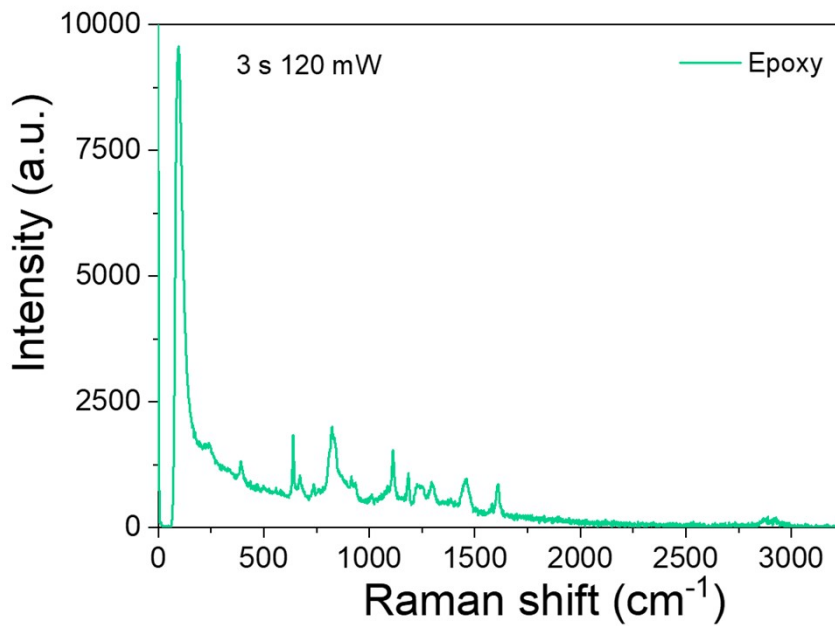

**Figure S3.** Raman spectrum of the epoxy used for preparing the demonstrator with customizable markers.
